# Supplementary material for: One-step synthesized Nb2O5−y-decorated spinel-type (Ni,V,Mn)3O4−x nanoflowers for boosting electrocatalytic reduction of nitrogen into ammonia
Source: Royal Society of Chemistry journal article supplement (doi:10.1039/d3gc03831a), 2023-01-01
Supplement: d3gc03831a1.pdf [file d3gc03831a1.pdf]

## Supplementary Information

One-step synthesized Nb<sub>2</sub>O<sub>5-y</sub>-decorated spinel-type (Ni,V,Mn)<sub>3</sub>O<sub>4-x</sub> nanoflowers for  
boosting electrocatalytic reduction of nitrogen into ammonia

Tadele Negash Gemed<sup>1</sup>, Dong-Hau Kuo<sup>1,2\*</sup>, Quoc-Nam Ha<sup>1</sup>

<sup>1</sup> Department of Materials Science and Engineering, National Taiwan University of Science and Technology, No. 43, Sec. 4, Keelung Road, Taipei 10607, Taiwan.

<sup>2</sup> Graduate Institute of Energy and Sustainability Technology, National Taiwan University of Science and Technology, No. 43, Sec. 4, Keelung Road, Taipei 10607, Taiwan.

\*Corresponding author

Fax: +011-886-2-27303291. E-mail: [dhkuo@mail.ntust.edu.tw](mailto:dhkuo@mail.ntust.edu.tw)

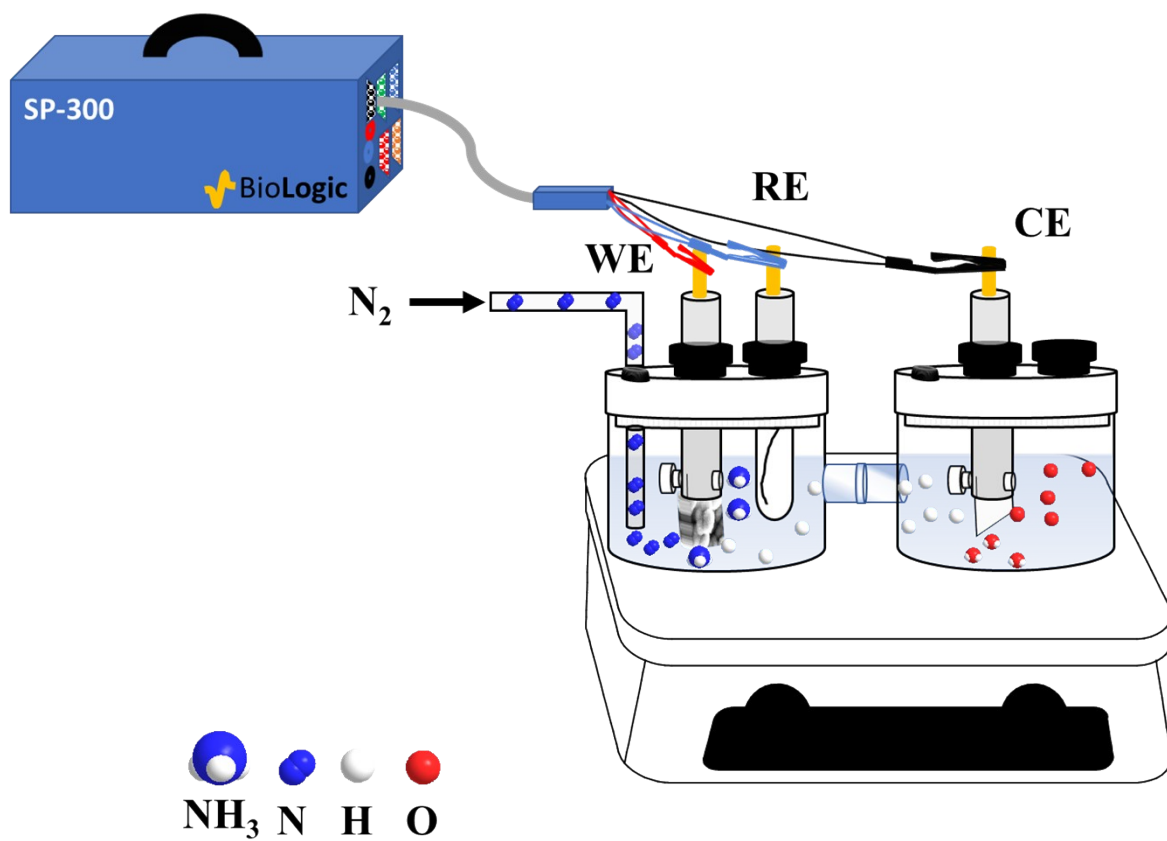

Fig. S1. H-cell compartment setup for electrochemical analysis.

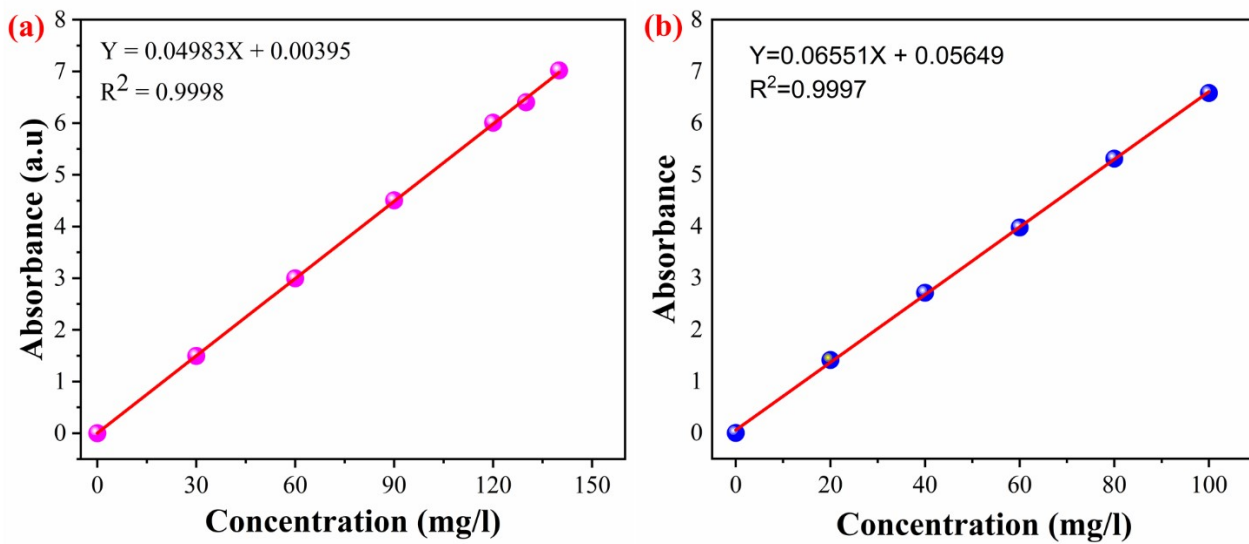

Fig. S2. UV-Vis calibration for (a)  $\text{NH}_3$  detection and (b)  $\text{N}_2\text{H}_4$  detection.

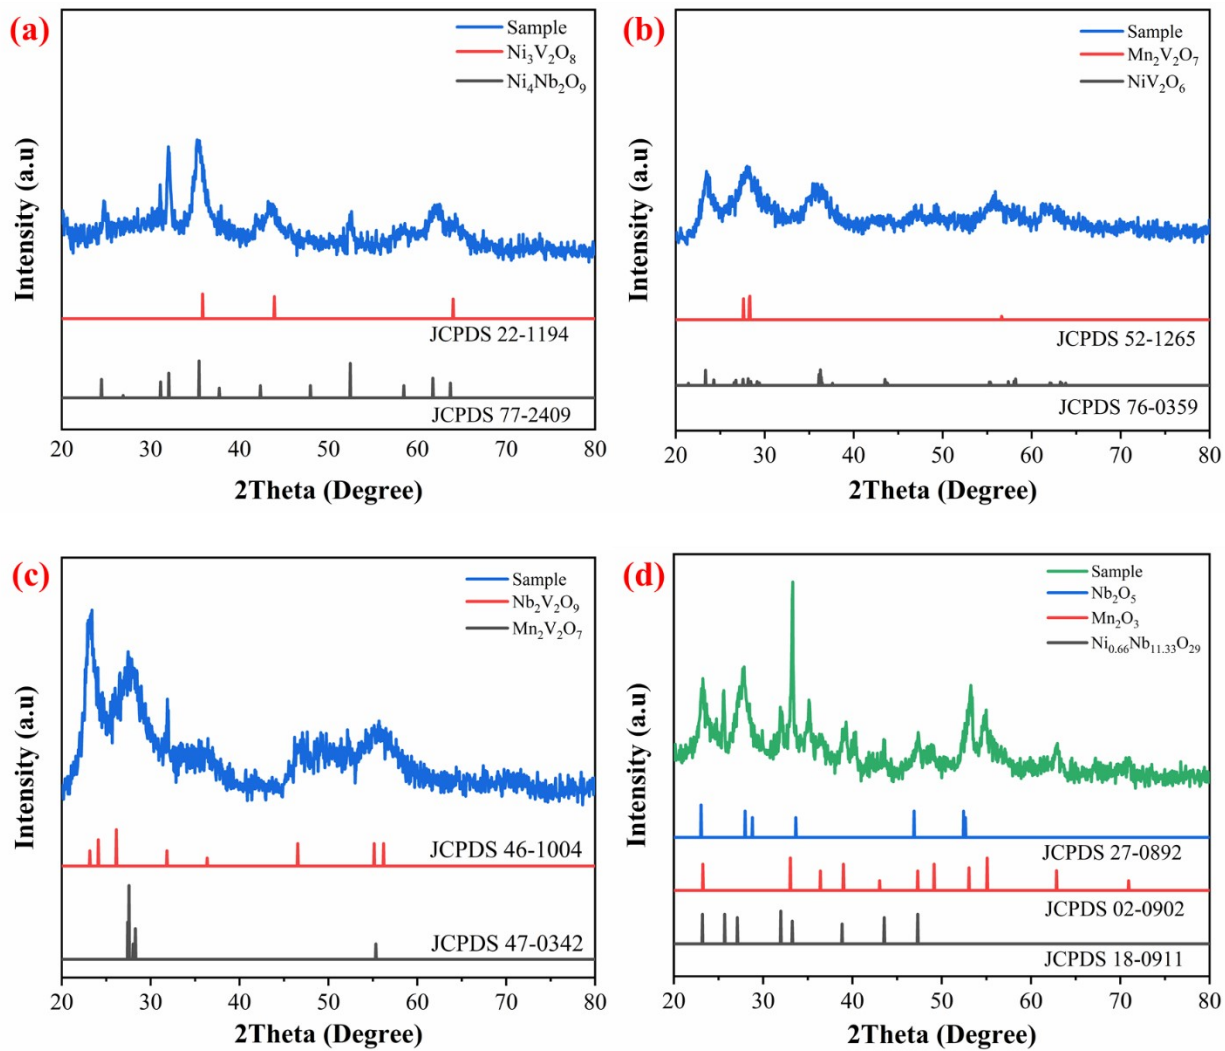

Fig. S3. X-ray diffraction (XRD) pattern for ternary metal-oxide system (a) NiVNb-666, b) NiVMn-662, c) VMnNb-626, and d) NiMnNb-626.

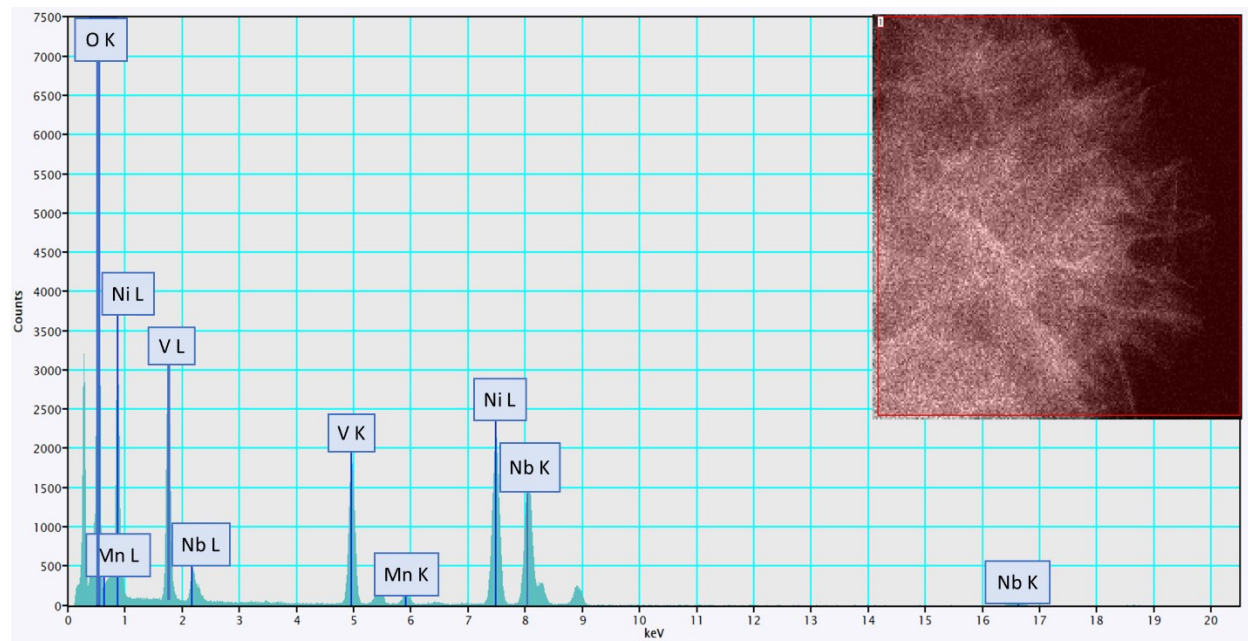

Fig. S4. STEM-EDS images of spinel-type  $(\text{Ni,V,Mn})_3\text{O}_{4-x}/\text{Nb}_2\text{O}_{5-y}$  nanoflowers on nickel foam.

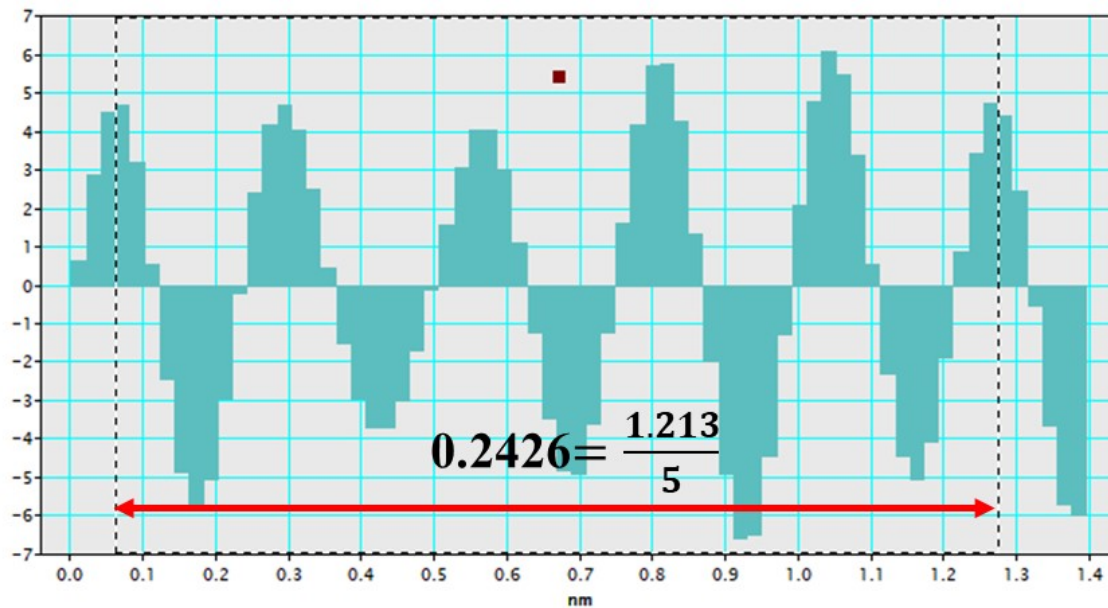

Fig. S5. HRTEM lattice fringe determinations for spinel-type  $(\text{Ni,V,Mn})_3\text{O}_{4-x}/\text{Nb}_2\text{O}_{5-y}$  nanoflowers on nickel foam.

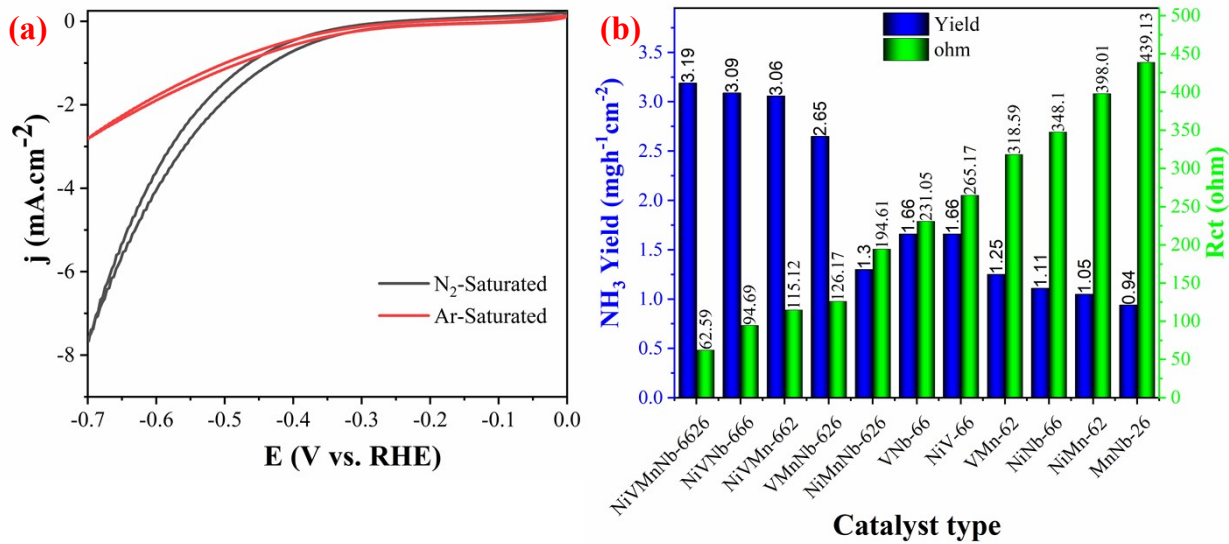

Fig. S6. (a) Cyclic voltammogram for quaternary NiVMnNb-6626 metal-oxide system in N<sub>2</sub> and Ar gas environments. (b) NH<sub>3</sub> Yield vs. Rct value of all catalyst types.

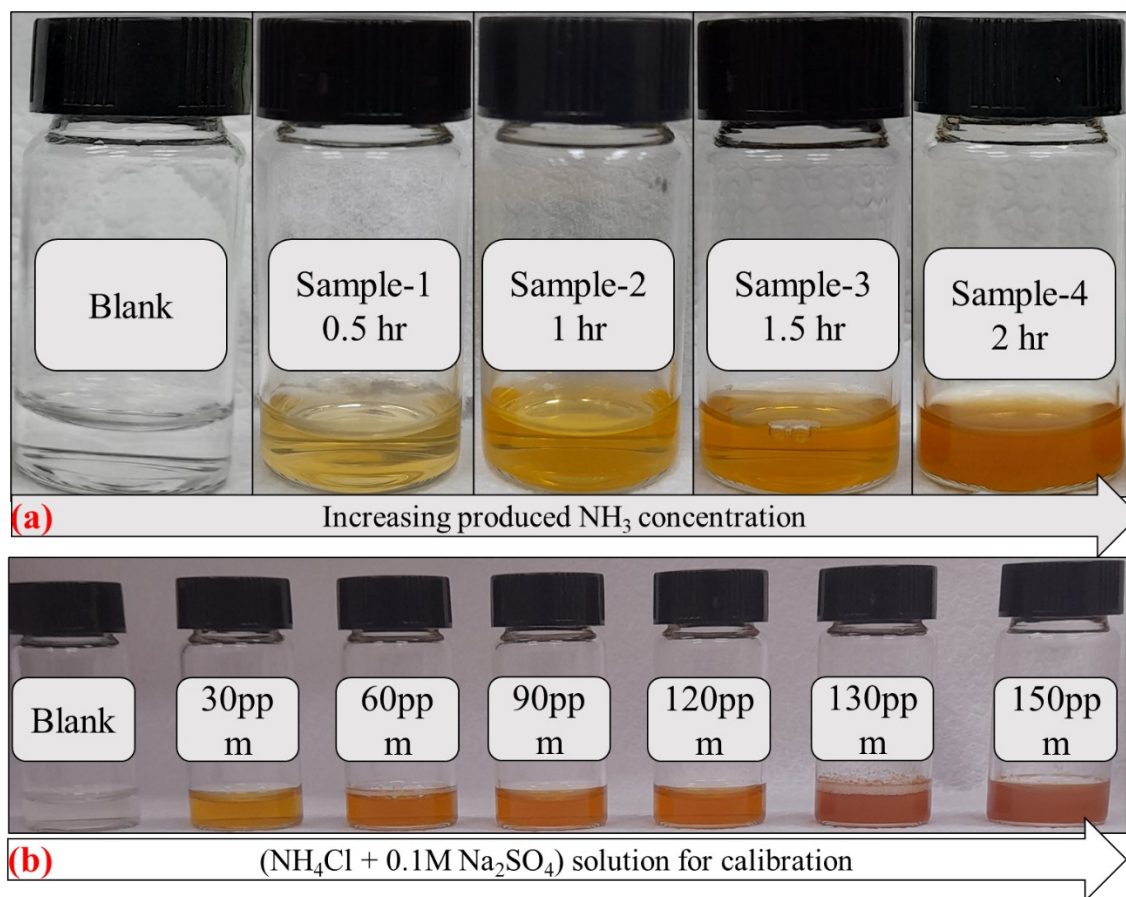

Fig. S7. NH<sub>3</sub> concentration (a) using spinel-type (Ni,V,Mn)<sub>3</sub>O<sub>4-x</sub>/Nb<sub>2</sub>O<sub>5-y</sub> nanoflower quaternary metal-oxide system in N<sub>2</sub> environments for 2 hr, (b) the corresponding NH<sub>4</sub>Cl + 0.1M Na<sub>2</sub>SO<sub>4</sub> solution as a standard solution for calibration.



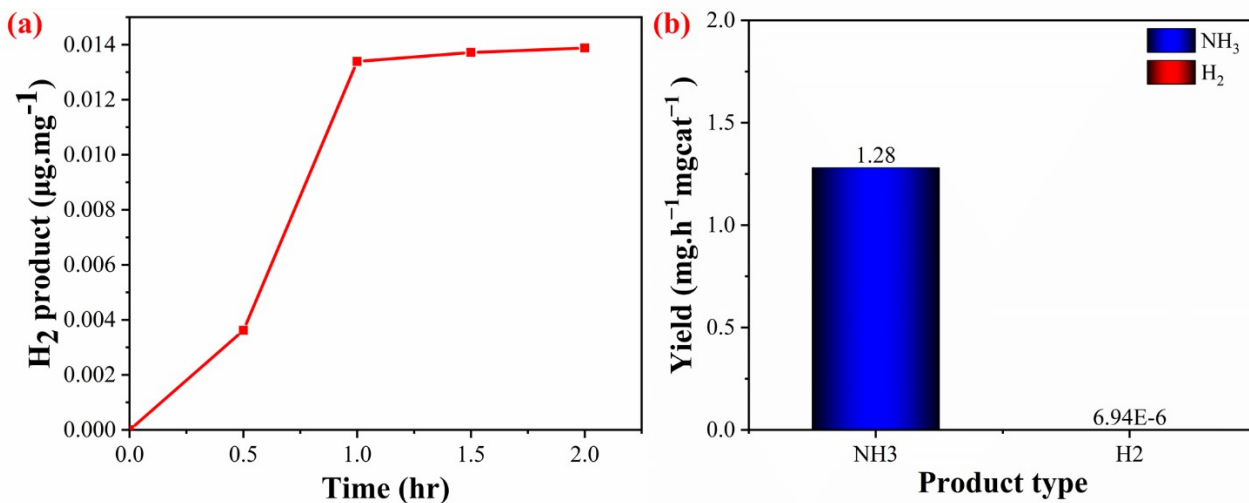

Fig. S8. a) Hydrogen concentration vs. reaction time b) NH<sub>3</sub> yield vs. H<sub>2</sub> production by spinel-type (Ni,V,Mn)<sub>3</sub>O<sub>4-x</sub>/Nb<sub>2</sub>O<sub>5-y</sub> nanoflower quaternary metal-oxide system at the potential of -0.5 V vs. RHE in N<sub>2</sub> environments.

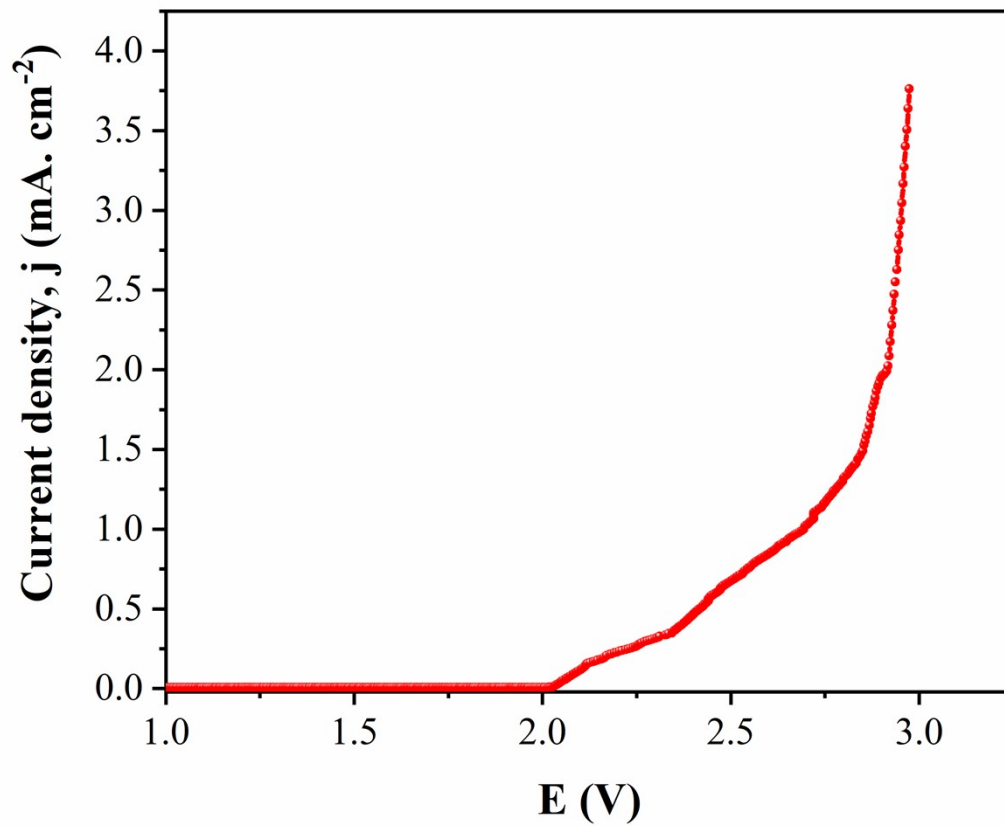

Fig. S9. LSV curve for a full cell with two-electrode system in a Na<sub>2</sub>SO<sub>4</sub> electrolyte solution.

Table S1. Synthesized materials system naming and their sample size with mass loading

| <b>No.</b> | <b>Catalyst type</b> | <b>Ratio (in mmol)</b> | <b>Labeling</b> | <b>Weight (mg)</b> | <b>Sample size (cm<sup>2</sup>)</b> |
|------------|----------------------|------------------------|-----------------|--------------------|-------------------------------------|
| <b>1</b>   | NiVMnNb              | 6:6:2:6                | NiVMnNb-6626    | 5                  | 1x2                                 |
| <b>2</b>   | NiVNb                | 6:6:6                  | NiVNb-666       | 5                  | 1x2                                 |
| <b>3</b>   | NiVMn                | 6:6:2                  | NiVMn-662       | 4.98               | 1x2                                 |
| <b>4</b>   | VMnNb                | 6:2:6                  | VMnNb-626       | 4.76               | 1x2                                 |
| <b>5</b>   | NiMnNb               | 6:2:6                  | NiMnNb-626      | 4.89               | 1x2                                 |
| <b>6</b>   | NiV                  | 6:6                    | NiV-66          | 4.97               | 1x2                                 |
| <b>7</b>   | VNb                  | 6:6                    | VNb-66          | 4.81               | 1x2                                 |
| <b>8</b>   | VMn                  | 6:2                    | VMn-62          | 4.79               | 1x2                                 |
| <b>9</b>   | NiNb                 | 6:6                    | NiNb-66         | 4.99               | 1x2                                 |
| <b>10</b>  | NiMn                 | 6:2                    | NiMn-62         | 4.51               | 1x2                                 |
| <b>11</b>  | MnNb                 | 6:2                    | MnNb-26         | 4.36               | 1x2                                 |

Note: During catalyst labeling, the elemental symbols indicate precursor metal type, and the number shows the ratio (in mmol) used during mixing.

Table S2. XPS compositional analysis of the NiVMnNb-6626 oxide system grown on Ni foam

| Element | Ni    | V     | Mn    | Nb    | O     |
|---------|-------|-------|-------|-------|-------|
| at. %   | 30.54 | 14.52 | 10.39 | 10.41 | 34.14 |

Table S3. XPS compositional analysis of NiVMnNb-6626 through the deconvoluted peak fitting to extract each element peak area to evaluate the valence state proportion

| Element | Ni (%)           | V (%)           |                 | Mn (%)           |                  | Nb (%)           |                  | O (%)          |                |
|---------|------------------|-----------------|-----------------|------------------|------------------|------------------|------------------|----------------|----------------|
|         | Ni <sup>2+</sup> | V <sup>3+</sup> | V <sup>4+</sup> | Mn <sup>2+</sup> | Mn <sup>3+</sup> | Nb <sup>4+</sup> | Nb <sup>5+</sup> | O <sub>L</sub> | O <sub>V</sub> |
| at. %   |                  | 60.3            | 39.7            | 36.8             | 63.2             | 82.3             | 17.7             | 81.9           | 18.1           |
| Ratio   | 30.539           | 8.76            | 5.76            | 3.83             | 6.56             | 8.56             | 1.85             | 28.0           | 6.16           |

Table S4. HRSEM-EDS compositional analysis of NiVMnNb-6626 metal-oxide system.

| Elements | Ni    | V     | Mn   | Nb   | O     |
|----------|-------|-------|------|------|-------|
| at. %    | 26.57 | 16.22 | 1.63 | 0.34 | 55.24 |

Table S5. Charge transfer resistance of the Nyquist plot from EIS data

|                        |              |           |           |           |            |        |        |        |         |         |         |
|------------------------|--------------|-----------|-----------|-----------|------------|--------|--------|--------|---------|---------|---------|
| <i>Electrocatalyst</i> | NiVMnNb-6626 | NiVNb-666 | NiVMn-662 | VMnNb-626 | NiMnNb-626 | NiV-66 | VNb-66 | VMn-62 | NiNb-66 | NiMn-62 | MnNb-26 |
| <i>R<sub>ct</sub></i>  | 62.59        | 94.69     | 115.12    | 126.17    | 194.61     | 231.05 | 265.17 | 318.59 | 348.1   | 398.01  | 439.13  |

Table S6. Comparison of NH<sub>3</sub> yield and Faradic efficiency (FE) of the reported electrocatalysts with good performance

| Catalyst                                                                                                                | Electrolyte                            | NH <sub>3</sub> Yield                                                                                | Catalyst amount                   | FE%   | Ref.      |
|-------------------------------------------------------------------------------------------------------------------------|----------------------------------------|------------------------------------------------------------------------------------------------------|-----------------------------------|-------|-----------|
| Spinel-type<br><i>MnNi<sub>0.5</sub>V<sub>1.5</sub>O<sub>4</sub></i> /<br><i>Nb<sub>2</sub>O<sub>5</sub></i> nanoflower | 0.1 M Na <sub>2</sub> SO <sub>4</sub>  | 3.188 mg.h <sup>-1</sup> cm <sup>-2</sup><br>1.27 mg.h <sup>-1</sup> mg <sub>cat</sub> <sup>-1</sup> | 5 mg<br>2 cm <sup>2</sup>         | 22.6  | This work |
| VO <sub>2</sub>                                                                                                         | 0.1 M Na <sub>2</sub> SO <sub>4</sub>  | 14.85 μgh <sup>-1</sup> mg <sup>-1</sup> <sub>cat</sub>                                              | 0.2mg.cm <sup>-2</sup>            | 3.97  | 1         |
| VNiON                                                                                                                   | 0.05 M Na <sub>2</sub> SO <sub>4</sub> | 6.78 μg/h.cm <sup>2</sup>                                                                            | 2 cm <sup>2</sup>                 | 5.57  | 2         |
| Ni(NPs)@V <sub>4</sub> C <sub>3</sub> Tx                                                                                | 0.1 M KOH                              | 21.29 mg.h <sup>-1</sup> mg <sub>cat</sub> <sup>-1</sup>                                             | 0.16 mg.cm <sup>-2</sup>          | 14.86 | 3         |
| NbO <sub>2</sub>                                                                                                        | 0.05 m H <sub>2</sub> SO <sub>4</sub>  | 11.6 μgh <sup>-1</sup> mg <sup>-1</sup> <sub>cat</sub>                                               | 1 mg.cm <sup>-2</sup>             | 32    | 4         |
| Nb <sub>2</sub> O <sub>5</sub>                                                                                          | 0.1 M HCl                              | 43.6 mg.h <sup>-1</sup> mg <sub>cat</sub> <sup>-1</sup>                                              | 0.1 mg                            | 9.26  | 5         |
| Ni <sub>2</sub> GeO <sub>4</sub>                                                                                        | 0.1 M KOH                              | 3.06 μg h <sup>-1</sup> cm <sup>-2</sup>                                                             | -                                 | 3.57  | 6         |
| LiMn <sub>2</sub> O <sub>4</sub>                                                                                        | 0.1 M HCl                              | 15.83 μg h <sup>-1</sup> mg <sub>cat</sub> <sup>-1</sup><br>3.17 μg/h.cm <sup>2</sup>                | 0.2 mg<br>1 cm <sup>2</sup>       | 7.44  | 7         |
| CoVP@NiFeV-LDHs HHNTs                                                                                                   | 0.05 M H <sub>2</sub> SO <sub>4</sub>  | 1.6×10 <sup>-6</sup> mol.h <sup>-1</sup> cm <sup>-2</sup>                                            | 1 mg<br>1 cm <sup>2</sup>         | 13.8  | 8         |
| N-C@NiO/GP                                                                                                              | 0.1 M HCl                              | 14.022 μg h <sup>-1</sup> mg <sub>cat</sub> <sup>-1</sup>                                            | 0.5 mg.cm <sup>-2</sup>           | 30.43 | 9         |
| Bi-K <sup>+</sup> pair                                                                                                  | 0.5 M K <sub>2</sub> SO <sub>4</sub>   | 200 mmol g <sup>-1</sup> h <sup>-1</sup><br>884 μg cm <sup>-2</sup> h <sup>-1</sup>                  | 94 μg cm <sup>-2</sup>            | 66    | 10        |
| SA-Ag/NC                                                                                                                | 0.1 M HCl                              | 270.9 μg h <sup>-1</sup> mg <sub>cat</sub> <sup>-1</sup><br>54.2 μg/h.cm <sup>2</sup>                | 0.2 mg<br>1 cm <sup>2</sup>       | 21.90 | 11        |
| Rh <sub>2</sub> Sb                                                                                                      | 0.5 M Na <sub>2</sub> SO <sub>4</sub>  | 228.85 μg h <sup>-1</sup> mg <sup>-1</sup> <sub>Rh</sub><br>23.35 μg /h.cm <sup>2</sup>              | 20 μg Rh<br>0.196 cm <sup>2</sup> | 6.10  | 12        |

|                                  |                                        |                                                                                                     |                                  |       |    |
|----------------------------------|----------------------------------------|-----------------------------------------------------------------------------------------------------|----------------------------------|-------|----|
| Rh-Se NCs/C                      | 0.1 M HCl                              | 175.6 mg h <sup>-1</sup> g <sup>-1</sup> <sub>Rh</sub><br>17.92 μg/h.cm <sup>2</sup>                | 0.02 mg<br>0.196 cm <sup>2</sup> | 13.3  | 13 |
| Ru SAs/N-C                       | 0.05 M H <sub>2</sub> SO <sub>4</sub>  | 120.9 μg h <sup>-1</sup> mg <sub>cat</sub> <sup>-1</sup><br>30.84 μg /h.cm <sup>2</sup>             | 0.255mg.cm <sup>-2</sup>         | 29.6  | 14 |
| Au/C <sub>3</sub> N <sub>4</sub> | 0.005 M H <sub>2</sub> SO <sub>4</sub> | 1350 μg h <sup>-1</sup> mg <sub>Au</sub> <sup>-1</sup><br>30 μg h <sup>-1</sup> .cm <sup>2</sup>    | 0.5 cm <sup>2</sup>              | 11.1  | 15 |
| Pt SAs/WO <sub>3</sub>           | 0.1 M K <sub>2</sub> SO <sub>4</sub>   | 342.4 μg h <sup>-1</sup> mg <sup>-1</sup> <sub>Pt</sub><br>10.27 μg/h.cm <sup>2</sup>               | 0.03 mg<br>1 cm <sup>2</sup>     | 31.1  | 16 |
| FePc/C                           | 0.1 M Na <sub>2</sub> SO <sub>4</sub>  | 137.95 μg h <sup>-1</sup> mg <sup>-1</sup> <sub>FePc</sub><br>137.95 μg /h.cm <sup>2</sup>          | 0.25 mg<br>0.25 cm <sup>2</sup>  | 10.5  | 17 |
| GDY/CO <sub>2</sub> N            | 0.1 M HCl                              | 219.72 μg h <sup>-1</sup> mg <sub>cat</sub> <sup>-1</sup>                                           | 6 cm <sup>2</sup>                | 58.60 | 18 |
| Pt/TiO <sub>2</sub>              | 0.1 M NaOH                             | 182 μg h <sup>-1</sup> mg <sub>cat</sub> . <sup>-1</sup><br>182 μg h <sup>-1</sup> cm <sup>-2</sup> | 1 cm <sup>2</sup>                | 1.57  | 19 |

## References

1. R. Zhang, H. Guo, L. Yang, Y. Wang, Z. Niu, H. Huang, H. Chen, L. Xia, T. Li, X. Shi, X. Sun, B. Li and Q. Liu, *ChemElectroChem*, 2019, **6**, 1014-1018.
2. B. Chang, L. Deng, S. Wang, D. Shi, Z. Ai, H. Jiang, Y. Shao, L. Zhang, J. Shen, Y. Wu and X. Hao, *J. Mater. Chem. A*, 2020, **8**, 91-96.
3. C.-F. Du, L. Yang, K. Tang, W. Fang, X. Zhao, Q. Liang, X. Liu, H. Yu, W. Qi and Q. Yan, *Mater Chem Front*, 2021, **5**, 2338-2346.
4. L. Huang, J. Wu, P. Han, A. M. Al-Enizi, T. M. Almutairi, L. Zhang and G. Zheng, *Small Methods*, 2019, **3**, 1800386.

5. J. Han, Z. Liu, Y. Ma, G. Cui, F. Xie, F. Wang, Y. Wu, S. Gao, Y. Xu and X. Sun, *Nano Energy*, 2018, **52**, 264-270.
6. D. Kim, S. Surendran, Y. Lim, H. Choi, J. Lim, J. Y. Kim, M.-K. Han and U. Sim, *Int. J. Energy Res.*, 2022, **46**, 4119-4129.
7. C. Li, J. Yu, L. Yang, J. Zhao, W. Kong, T. Wang, A. M. Asiri, Q. Li and X. Sun, *Inorg. Chem.*, 2019, **58**, 9597-9601.
8. M. Arif, G. Yasin, L. Luo, W. Ye, M. A. Mushtaq, X. Fang, X. Xiang, S. Ji and D. Yan, *Appl. Catal. B: Environ.*, 2020, **265**, 118559.
9. Y. Chen, B. Wu, B. Sun, N. Wang, W. Hu and S. Komarneni, *ACS Sustain. Chem. Eng.*, 2019, **7**, 18874-18883.
10. Y.-C. Hao, Y. Guo, L.-W. Chen, M. Shu, X.-Y. Wang, T.-A. Bu, W.-Y. Gao, N. Zhang, X. Su, X. Feng, J.-W. Zhou, B. Wang, C.-W. Hu, A.-X. Yin, R. Si, Y.-W. Zhang and C.-H. Yan, *Nat. Catal.*, 2019, **2**, 448-456.
11. Y. Chen, R. Guo, X. Peng, X. Wang, X. Liu, J. Ren, J. He, L. Zhuo, J. Sun and Y. Liu, *Acs Nano*, 2020, **14**, 6938-6946.
12. N. Zhang, L. Li, J. Wang, Z. Hu, Q. Shao, X. Xiao and X. Huang, *Angew. Chem., Int. Ed.*, 2020, **132**, 8143-8148.
13. C. Yang, B. Huang, S. Bai, Y. Feng, Q. Shao and X. Huang, *Adv. Mater.*, 2020, **32**, 2001267.
14. Z. Geng, Y. Liu, X. Kong, P. Li, K. Li, Z. Liu, J. Du, M. Shu, R. Si and J. Zeng, *Adv. Mater.*, 2018, **30**, 1803498.



15. X. Wang, W. Wang, M. Qiao, G. Wu, W. Chen, T. Yuan, Q. Xu, M. Chen, Y. Zhang, X. Wang, J. Wang, J. Ge, X. Hong, Y. Li, Y. Wu and Y. Li, *Science Bulletin*, 2018, **63**, 1246-1253.
16. R. Hao, W. Sun, Q. Liu, X. Liu, J. Chen, X. Lv, W. Li, Y. p. Liu and Z. Shen, *Small*, 2020, **16**, 2000015.
17. C. He, Z.-Y. Wu, L. Zhao, M. Ming, Y. Zhang, Y. Yi and J.-S. Hu, *ACS Catal.*, 2019, **9**, 7311-7317.
18. Y. Fang, Y. Xue, Y. Li, H. Yu, L. Hui, Y. Liu, C. Xing, C. Zhang, D. Zhang, Z. Wang, X. Chen, Y. Gao, B. Huang and Y. Li, *Angew. Chem. Int. Ed.*, 2020, **59**, 13021-13027.
19. J. L. Lv, Z. F. Tian, K. Dai, Y. X. Ye and C. H. Liang, *J. Colloid Interf. Sci.*, 2019, **553**, 126-135.
